# Supplementary material
Source: publisher site journal article supplement (https://www.dovepress.com/article/376447)
Supplement: Supplementary file 1 [file get_supplementary_file.php]

## Supplementary materials

**Supplementary Table S1:** International Classification of Diseases (ICD) Codes Used to Retrieve Data

| Diagnosis                                                                                                                                                                                                    | ICD-9 Code(s) | ICD-10 Code(s)                                                                 |
|--------------------------------------------------------------------------------------------------------------------------------------------------------------------------------------------------------------|---------------|--------------------------------------------------------------------------------|
| Orbital Hemorrhage                                                                                                                                                                                           | 376.32        | H05.231, H05.232, H05.233, H05.239                                             |
| Open Globe                                                                                                                                                                                                   | 871           | S05.2, S05.3, S05.5, S05.6, S05.7                                              |
| Vitreous Hemorrhage                                                                                                                                                                                          | 364.41        | H43.1                                                                          |
| Open wound of adnexa                                                                                                                                                                                         | 870           | S01.1, S05.4                                                                   |
| Superficial eye injury                                                                                                                                                                                       | 918           | S00.2, S05.0                                                                   |
| Contusion of eye or adnexa                                                                                                                                                                                   | 921           | S00.1, S05.4                                                                   |
| Orbital Fracture                                                                                                                                                                                             | 802.6, 802.7  | S02.30XA, S02.30XB, S02.31XA, S02.31XB, S02.32XA, S02.32XB, S02.3XXA, S02.3XXB |
| Nasal Fracture                                                                                                                                                                                               | 802.0, 802.1  | S02.2XXA, S02.2XXB                                                             |
| Maxillary Fracture                                                                                                                                                                                           | 802.4, 802.5  | S02.40XA, S02.40XB, S02.41XA, S02.41XB                                         |
| Low Vision                                                                                                                                                                                                   | 369           | H54                                                                            |
| Optic Neuropathy                                                                                                                                                                                             | 950.0         | S04.01                                                                         |
| Diplopia                                                                                                                                                                                                     | 368.2         | H53.2                                                                          |
| Orbital Edema                                                                                                                                                                                                | 376.33        | H05.22                                                                         |
| Orbital Cellulitis                                                                                                                                                                                           | 376.01        | H05.01                                                                         |
| ICD = International Classification of Diseases. The above codes were utilized to determine whether patients with primary orbital hemorrhage were also diagnosed with other traumatic facial/ocular injuries. |               |                                                                                |

**Supplementary Table S2: External Causes of Injury and Poisoning Codes (E-codes) Used to Retrieve Data**

| Mechanism | ICD-9 E-Code(s)                                                            | ICD-10 E-Code(s)                   |
|-----------|----------------------------------------------------------------------------|------------------------------------|
| MVA       | E810-825                                                                   | V00-79                             |
| Fall      | E880-888                                                                   | W00-19                             |
| Assault   | E960-969                                                                   | X92-99, Y00-09                     |
| Objects   | E916-920                                                                   | W20-W49                            |
| Other     | E800-807, E826-848, E850-869,<br>E890-915, E921-929, E950-959,<br>E970-999 | V80-99, W50-99, X00-83, Y21-<br>38 |

ICD = International Classification of Diseases. E-Codes = External Causes of Injury and Poisoning Codes. The above codes were utilized to determine the etiology of primary orbital hemorrhage (if documented) from the emergency department sample database.

**Supplementary Table S3: Lateral Canthotomy Procedure Codes Used to Retrieve Data**

| Procedure                                                                                                                                                                                                                            | ICD-9 Code | ICD-10 Codes                                                                                                        | CPT Code |
|--------------------------------------------------------------------------------------------------------------------------------------------------------------------------------------------------------------------------------------|------------|---------------------------------------------------------------------------------------------------------------------|----------|
| Lateral Canthotomy                                                                                                                                                                                                                   | 08.51      | 08NN0ZZ, 08NN3ZZ, 08NNXZZ,<br>08NP0ZZ, 08NP3ZZ, 08NPXZZ,<br>08NQ0ZZ, 08NQ3ZZ, 08NQXZZ,<br>08NR0ZZ, 08NR3ZZ, 08NRXZZ | 67715    |
| ICD = International Classification of Diseases. CPT = Current Procedural Terminology. The above codes were used to probe the emergency department sample to determine if lateral canthotomy was documented as having been performed. |            |                                                                                                                     |          |

**Supplementary Figure S1:** Primary orbital hemorrhage-associated mechanisms of injury across age groups

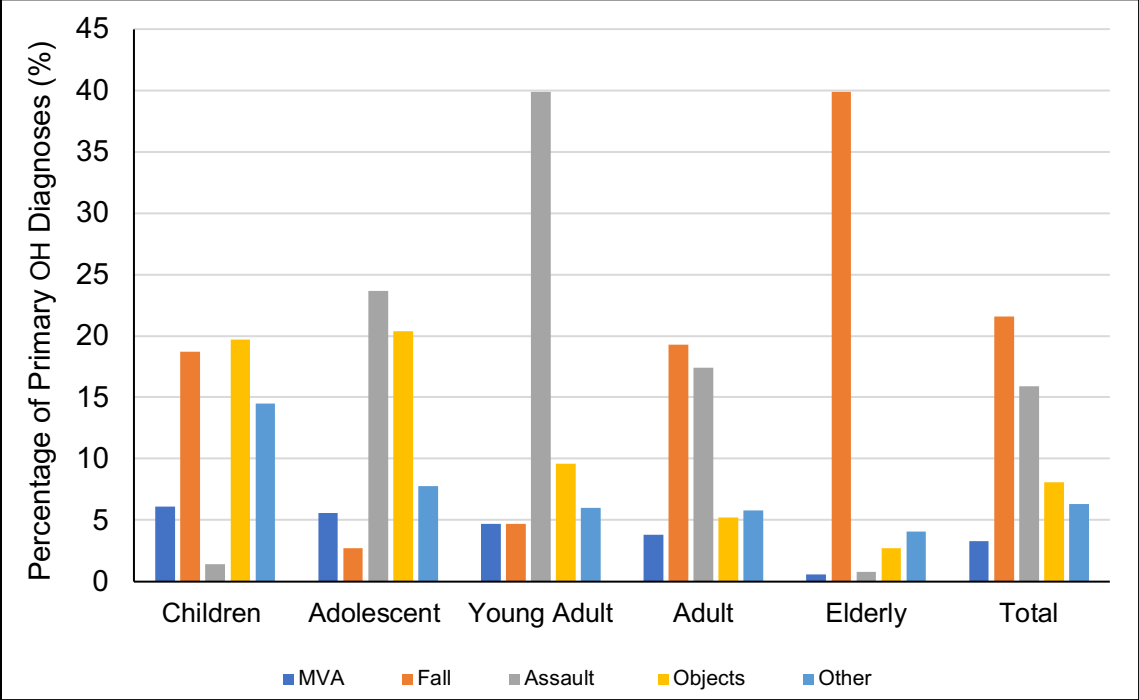

**Supplementary Figure S2:** Overall incidence of various mechanisms of injury causing primary orbital hemorrhage from 2006 to 2018 (MVA = Motor vehicle accident)

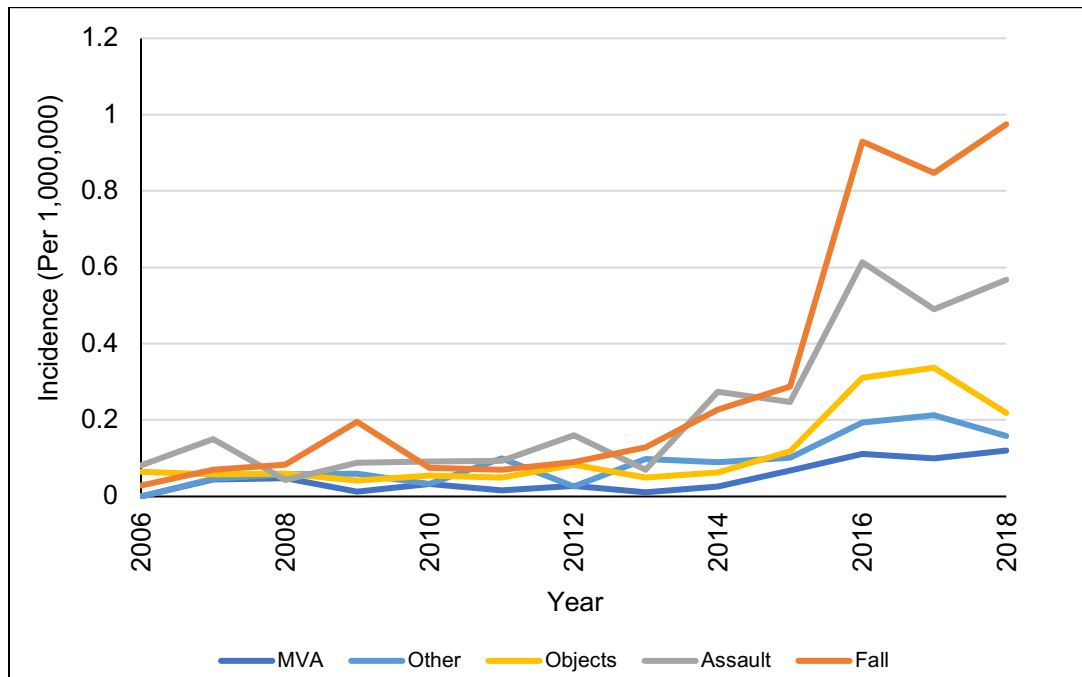

**Supplementary Figure S3:** Overall assault and fall incidence in the United States population from 2006 to 2018, extrapolated from the National Emergency Department Sample

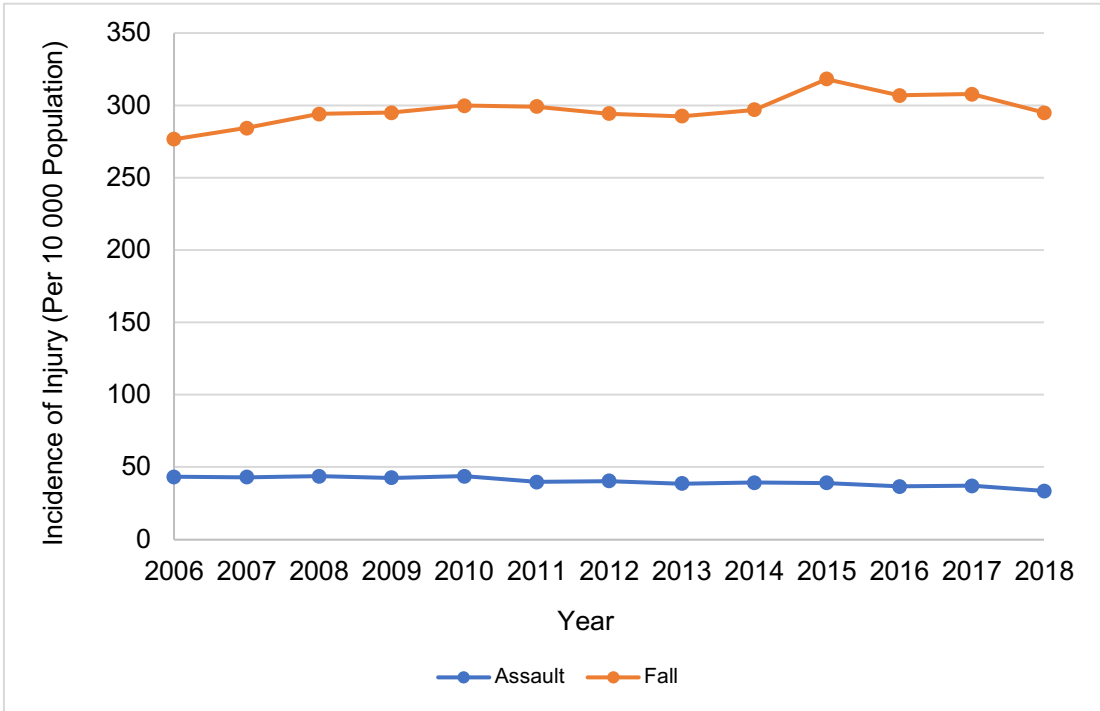

**Supplementary Table S4:** Most common primary OH-associated ocular injuries across age groups

| Associated Injury | Percent of Primary OH Diagnoses in Age Group with the Associated Injury |                                 |                                   |                             |                              |                  | p value <sup>a</sup> |
|-------------------|-------------------------------------------------------------------------|---------------------------------|-----------------------------------|-----------------------------|------------------------------|------------------|----------------------|
|                   | Children (≤ 10)<br>(N = 589)                                            | Adolescent (11-20)<br>(N = 488) | Young Adult (21-44)<br>(N = 1423) | Adult (45-64)<br>(N = 1370) | Elderly (≥ 65)<br>(N = 2083) | Total (N = 5953) |                      |
|                   | n (%)                                                                   | n (%)                           | n (%)                             | n (%)                       | n (%)                        | n (%)            |                      |
| Contusion         | 55 (9.3)                                                                | 40 (8.2)                        | 95 (6.7)                          | 84 (6.1)                    | 104 (5.0)                    | 377 (6.3)        | 0.45                 |
| Nasal Fracture    | --- <sup>b</sup>                                                        | --- <sup>b</sup>                | 82 (5.7)                          | 38 (2.8)                    | 26 (1.2)                     | 158 (2.7)        | 0.0079               |
| Wound             | 13 (2.1)                                                                | 13 (2.6)                        | 43 (3.0)                          | 31 (2.3)                    | 43 (2.1)                     | 143 (2.4)        | 0.93                 |
| Low Vision        | --- <sup>b</sup>                                                        | --- <sup>b</sup>                | 14 (1.0)                          | 14 (1.1)                    | 84 (4.0)                     | 123 (2.1)        | 0.0076               |
| Orbital Fracture  | --- <sup>b</sup>                                                        | --- <sup>b</sup>                | 41 (2.9)                          | 23 (1.7)                    | 25 (1.2)                     | 94 (1.6)         | 0.2411               |
| Superficial       | --- <sup>b</sup>                                                        | --- <sup>b</sup>                | 37 (2.6)                          | 35 (2.5)                    | --- <sup>b</sup>             | 93 (1.6)         | 0.069                |
| Diplopia          | --- <sup>b</sup>                                                        | --- <sup>b</sup>                | 34 (2.4)                          | 16 (1.2)                    | --- <sup>b</sup>             | 60 (1.0)         | 0.0657               |

<sup>a</sup> = statistical assessment based on assumption of equal distribution among age groups; <sup>b</sup> = 10 or fewer patients reported in this category, information omitted from table to preserve patient anonymity.
